# Supplementary material
Source: PubMed Central journal article supplement (PMC2796935)
Supplement: supp_137.1.113_043174-FigS2.pdf [file supp_137.1.113_043174-FigS2.pdf]

GCT --MWTNVFRIGGLHNVSWFQFLPSETELNPGFDRSSRAEQNEVATYLVLSSHLRLQKEGF 58  
Hs MED13 MTAAANWVANGASLEDCHSNLFLSLAELTGIKWRRYNFGGHGDCGPIISAPAQDDPILLSF 60  
:\* . \* . : . : : . . : \* . . : : . . : : . \*

GCT LTTWTNSFVGPWDPSQGLYNPDEKIKLWLFLPGRHSSISDKAQAAVS KLRVVASGIWVAP 118  
Hs MED13 IRCLQANLLCVWRR---DVKPDKELWIFWWGDEPNLVG---VIHHELQVVEEGLWEN- 112  
: : : \* : : \* \* \* \* . . . : . . : \* : \* \* \* \* \*

GCT GDSEEISVAFSQSLRNCIERALSGISYMRFGDVFSKFS PQSEE-----YLR 165  
Hs MED13 GLSYECRTLLFKAIHNLLERCLMDKNFVRIGKWFVRPYEKDEKPVNKSEHLSCAFTFFLH 172  
\* \* \* . : : : \* \* \* . . . : \* : \* . \* : : \* : : : : \*

GCT GQP-----TVEFIFAATEEAVFVHVII SAKNVRTLSSGDAERMLRSSL 208  
Hs MED13 GESNVCTSVEIAQHQPYYLINEEHIHMAQSSPAPFQVLVSPYGLNGTLTGQAYKMSDPAT 232  
\* : . . \* . \* . \* . . . . : \* : \* . . . : \* : \* \* \* : \*

GCT KNSSYRLPAFRKCLGLAKSEDNRLCYINTSHRPMFLPPVIVSPHGMRG--SLTGFPCNDL 266  
Hs MED13 RKLIEEWQYFYPMVLKKEESKEEDELGYDDDFPVAVEVIVGGVRMVYPSAFVLISQNDI 292  
: : . \* : \* . \* . . . : . . . : \* \* . \* : : . . \* \* :

GCT VKQVYFSSGNLKTSTGYVGLP-----SHIGRGSRLINGNHCVVEV 306  
Hs MED13 PVPQSVASAGGHIAGVQQGLGSVKDPSNCGMPLTPPTSPEQAILGESGGMQSAASHLVSQ 352  
. : \* . . : : \* \* \* : : \* . . . : . . \* .

GCT TLGCCQNRN-DNTSQANSTFAVNLPHNQCEPSVSGKDRKQSDLSSVCEKKFIYPAEA 365  
Hs MED13 DGGMITMHSFKRSKIPPKLHNHMVHRVWKECILNRTQSKRSQMSTPTLEEEPASNPAW 412  
\* : . . . . : . . : : \* . \* : . . : : \* . . . : \* : \*\*

GCT VLVPIQLSFAKFLKRGDFDCLGASEN---KSDGFYEKNGYNSSGSSRNSSISSTS-- 420  
Hs MED13 DFVDPTQRVSCSRSRHKLLKRCVAGPNRPPTVSQPGFSAGPSSSSSLPPPASKHKTAER 472  
: \* \* . . \* : : . : \* . . . . . . . \* \* . . \* \* \* \* \* :

GCT -----SASSGSGWRMTSRTGDLADADSLTCRQSGLT 452  
Hs MED13 QEKGDKLQKRPLIPFHHRPSVAEELCMEQDTPGQKLGLAGIDSSLEVSSSRKYDKQMAVP 532  
. : \* . : : . . \* : : . . : \* . . . .

GCT CNDDRLKMGSK-----RPRTGMAESFG--QVGIENDQIGWDWDADDD 492  
Hs MED13 SRNTSKQMNLPMDSPHSPISPLPPTLSQPGRQETESLDPPSVPVNPALYGNGLQL 592  
. . : : \* : : : : \* \* : \* \* . . \* : : \* . : : :

GCT DDDREVGM DIKALLSEFGDFGDFENDALPFGEPPGTAESHVLVFPD SADVGSSP---- 548  
Hs MED13 STLDDRTVLVGQRLPLMAEVSETALYCGIRPSNPESSEKWWHSYRLPPSDDAEFRPPELQ 652  
. : : : \* . : : : : . : : \* : : : \* \* \* . \*

GCT -----VDMMDVSDQIVLPVGFSSFESEFNVPVPIIDECLIKSQEVLHSSITSVP--S 597  
Hs MED13 GERCDAKMEVNSESTALQRLLAQPKNRFKIWQDKQPQLQPLHFLDPLPLSQPGDSLGEV 712  
\* : . . : \* \* . \* : : : \* : : : . \* . . .

GCT NQMSISSTGEFDHLLKAEAMMTFAPEYGAVEAPMSEISSSTFFKSPYLPKSHKVESSNSRT 657  
Hs MED13 NDPYTFEDGDIKYIFTANKKCKQGTEKDSLKKNKSEDFGFTKDVTTPGHSTPVPDGKNAM 772  
\* : . \* : : : \* : . . \* : : : \* \* . . . : \* \* . . .

GCT SNYVYGATPPTDSDGAG----DMILFGSKSCIGNAGR TLYHSREHYTQVEGRKGRHD 712  
Hs MED13 SIFSSATKTDVQRDNAAGRAGSSSLTQVTDLAPSLHLDNIFDNSDDDELGAVSPALRSS 832  
\* : . . . . : : \* \* . . : : . . : : \* : . . \* .

GCT KLPTVISDNS-----STKEGVSQSIHSHKSAANAVK 743  
Hs MED13 KMPAVGTEDRPLGKDGRAAVPYPTVADLQRMFPTPPSLEQHPAFSPVMNYKDGISSETV 892  
\* : \* \* : : : . . \* : : \* . . . .

GCT VVQGGKTDGISAVVSTLLSSK TLLATD-----VGSVMFQA 778  
Hs MED13 TALGMMESPMVSMVSTQLTEFKMEVEDGLGSPKPEEIKDFSYVHKVPSFQPFVGSMSFAP 952  
. . \* . : : \* \* \* \* . . : . \* \* \* \* \*

GCT FCMRMRHII TSSKHSSPVSLTR-----LSGNFFLNQLSNEPSTLTDNISAR 824  
Hs MED13 LKMLPSHCLLPLKIPDACLF RPSWAIPPKEQLPMPPAATFIRDGYNNVPSVGLADPDY 1012  
: \* : . \* . . . : : : \* : : . \* \*\* . : .

GCT NEIYKKDIPTR IAGDFDGGMLDS-HMSAPVGVWRTVSVPKTAKPASSPNI EAGSS----- 878  
Hs MED13 LNT PQMNTPVTLNSAAPASNSGAGVLPSPATPRF SVPTPRTPRTPRTPRGGGTASGQGSV 1072  
: : : \* . : . . . : : : \* . : \* . \* : \* . . . : \*

GCT -----LPHSSFSEDSL SYQRQPLQDLLDGIALLVQQATS-----FVDLALDSDC 924  
Hs MED13 KYDSTDQGS PASTPSTTRPLNSVEPATMQPIPEAHSLYVTLILSDSVMNIFKDRNFDSCC 1132  
\* \* : \* \* . : . : \* : : . : \* \* \* \* \* \* \* \* : \* \* \*

GCT GDGP-----YGWLALEELWRRELSCGP-----SAGHAGCGGTLASCHSLDIAG---- 967  
Hs MED13 ICACNMNIK GADVGLYIPDSSNEDQYRCTCGFSAIMNRKLGYN SGLFLEDELDFGKNSD 1192  
. \* : . . : \* : \* . . \* . . \* \* . \* \* \* \*

GCT -----VKLVDP LSAEVFPSSVITLLQSDIKTALKSA-----FGQSDG 1004  
Hs MED13 IGQAAERRLM MCQSTFLPQVEGTTKKPQEPPI SLLLLLQHQHTQPFASLNFLDYISSNNRQ 1252  
: : . . . : \* \* : : \* \* . : . : \* . . .

GCT PLSVTDWCKGRNQSGDGGSI SEGF TAE----- 1032  
Hs MED13 TLP CVSWSYDRVQADNNDYWTECFNALEQGRQYVDNPTGGKVDEALVRSATVH SWPHSNV 1312  
.\* . \* . \* \* : . . . : \* \* . \*

GCT -ALSEVNGVNI SDDFIIDKYFGKQAVSNAIDGGK GDETAQSQDIYSSELLR----- 1082  
Hs MED13 LDISMLSSQDVVRMLLSLQPFLODAIQKRRTGRTWENIQHVQGPLTWQOFHKMAGRGTYG 1372  
: \* . . . : : : : \* : : : : \* . : : : \* . : : : :

GCT --PTLFVLPSPAILVGYQDDWLKISTNSLTHWEKAPFEPYALPKSINYAVVCPDIDPLTC 1140  
Hs MED13 SEESPEPLPIPTLLVGYDKDFLTISPFSLPFWERLLLLPYGGHRDVAYIVVCPENEALLE 1432  
: \* \* \* : : \* \* \* : \* \* . \* \* . \* \* : : \* \* . : : \* \* \* \* : : \*

GCT AATDF FQQLGTGESTLSL FVKEVMLKHDRNWLGTHLPQSLGNQMEKDVGR LSSSGFVLLD 1200  
Hs MED13 GAKTFFRDL SAVYEMCRLGQHKPICKVLRD GIMRVGKTVAQKLTDELVSEWFNQPSGEE 1492  
.\* \* \* : \* . : . . : : \* \* : : : : : \* . . . : :

GCT CPQSMKIESNNTSLLGSLSDYFLSLSNGWNVNSYLKSLSKALKGLKLGSGLYTNQKEGSG 1260  
Hs MED13 NDNHSRLKLYAQVCRHHLAPYLATLQLDSSLLIPP KYQTPPAAAQQA TPGNAGPLAPNG 1552  
: : : \* : \* : \* . . . : \* : . . . : . . . \*

GCT SPCVVVYIVCPFPDPSAVLRTIVESSIALG SVIQSDRRRSILNSQVARAFSSSTAVDEA 1320  
Hs MED13 SAAPPAGSAFNPTSNSSSTNPAASSSASGSSVPPVSSSASAPGISQIS--TTSSSGFSGS 1610  
\* . . . . \* : . . . \* \* : \* \* . . : \* \* : : \* \* : : \* \* : : \*

GCT SISHIPVLSGFSVPKLVLQVSVDSIFRITSPSFNELVILKDTAFSVYNKARRISRGMPN 1380  
Hs MED13 VGGQNPSTGGISADRTQGNIGCGG----DTPGQSSSQPSQDQESVTERERIGIPTEPD 1666  
. : \* . \* : \* . : : . . \* . \* . . : \* \* \* : : \* \* \* :

GCT DAFFSSSLPSRSSSALTPMNSISGIWKDCGGSMRTGSTHPRDGEIDVSLRTSGWDTSTSW 1440  
Hs MED13 SADSHAHPPAVVIYMVPFTYAAEEDSTSGNFWLLSLMRCYTEMLDN--LPEHMRNSFIL 1724  
.\* : \* : \* : \* . : . . \* . : . : \* \* . . \*

GCT QIPRSGGLSCDPNRNGDFYLNDEIFYLFEPLFILSEPGSV ERGVSPFTSLGSESSKPIP 1500  
Hs MED13 QIVPCQYMLQTMKDEQVFIQYLYKSMAFSVYCQRRPLPTQIHIKSLTGFGPAASIEMTL 1784  
\*\* . : : : \* \* : \* . \* . \* : : . . : \* \* :

GCT EDGGRGSGPGMNS----MEGITSGSSSQGDV SQLEKAI PSLHCCYGWTE DWRWLVS IWT 1556  
Hs MED13 KNPERPSPIQLYSPFFILAPIKDKQTELG ETFGEASQKYNVLFVGYCLSHDQRWLLASCT 1844  
: : \* \* : \* : \* . . . \* : . : \* . \* : \* \* \* : \* \*

GCT DAR-VLQQGCQILQACSSPDN-----GSFKPRDFVITRIGNFFELEYQEWQKAIYS 1606  
Hs MED13 DLHGELLETCVVNIALPNRRSRKVSARKIGLQKLWEWCIG-IVQMTSLPWRVVIGRLGR 1903  
\* : \* : \* : \* . . . . \* \* : : \* \* : : \* \* : : \*

```

GCT          AGGPEIKKWPIQLRRSAPSGIATNSNGSSLQQQDLSLIQERASSTSTLYSSHSKQSTFVK 1666
Hs MED13    LGHGELKDWISILLGECSLQTIISKLLKDVCRMCG-ISAADSPSILSACLVAMEPQGSFVVM 1962
            *  *:*:*:* *  ..: . *::: . . . . . :*  .. :  :: * :  ..: *  .*

GCT          G---SMGQSAGRKQIMGGQTIISGTPRGLFQVWHISISFASISLDHSLHFVLP-AELVSAGG 1722
Hs MED13    PDAVTMGSVFGRSTALNMQSSQLNTPQDASCTHILVFPTSSTIQVAPANYPNEDGFSPPN 2022
            :**  **  .. * :  . . . . . . * : * : * :  *  : * . . .

GCT          GQSSTGMSSVNYIEGFTPVKSLG--STAFSYMIPSPNMRFLHPSPLQLPTCLTAESPPL 1780
Hs MED13    DDMFVDLPFPDDMDNDIGILMTGNLHSSPNSSPVSPGSPSGIGVGSHFQHSQSQGERLL 2082
            .:  . . . . :  :: .  *  :: .  :***.  . . . . . :  . :  .  *

GCT          AHELLHSGYAIPLSTGFVVS----KAVPSMRKDSRINVKKEWPSVLSVSLIDYGGYDNA 1836
Hs MED13    SREAPEELKQQPLALGYFVSTAKAENLPQWFSSCPQAQNQCPLFLKASLHHHIS--VAQ 2140
            ::  .:  ** : * : * *  : : * .  . *  : : : : *  . * . * *  . : .

GCT          HDKILQGIVKQGGGKETRDFEVESHLLILESIAAELHALSWMTVSPAYLDRRTALPFHCD 1896
Hs MED13    TDELLPARNSQRPVPHPLDSKTTSD---VLRFVLEQYNALSWLTCNPATQDRTSCLPVHFV 2197
            *::*  .  .*  .  :  : * .  :  : :***:*  .*  **  :***.*

GCT          MVLRLRRLHMFADKEVSRIPTKTV 1921
Hs MED13    VLTQLYNAINIL----- 2210
            :: : *  . :

```

identical residues (\*) 313/1921 = 16%

highly conserved residues (same color) (:) 358/1921 = 19%

semi-conserved residues (.) 353/1921 = 18%

Alignment made with Clustal W <http://www.ebi.ac.uk/clustalw/>

Colors:

Red = Small and hydrophobic residues (AVFPMILW)

Blue = Acidic residues (DE)

Magenta = Basic residues (RK)

Green = Hydroxyl + Amine (STYHCNGQ)
