# Supplementary material
Source: PubMed Central journal article supplement (PMC2796935)
Supplement: supp_137.1.113_043174-FigS3.pdf [file supp_137.1.113_043174-FigS3.pdf]

CCT -----MLSP--LFVISIGAVRKCLRAINESRALKRKVIKRLSDSNPFQ 41  
HsMED12 MAAFGLISYEHRLKRPRLGPPDVYPQDPKQKEDELTAALNVKQGFNNQPAVSGDEHGS AK 60  
\*.\* :: . . . \* \*:\* .: .: .:

CCT FIFCAEFRAGQVYGVPLSGSLLCK--PGFPEQRSCGEETKKRWIESLSQQ----- 89  
HsMED12 NVSFPNAKISSNFSSIIAEKLRCNTLPDTGRRKPQVNQKDNFWLVTARSQSASINTWFTDL 120  
: : .. :. :. \* \*:\* \* .:.. :.:. :\* : : \*

CCT --HKRLRSLADNIPGYRRKT-LFEVLIRNNVPLLRAFWFKVVTYLNQVHCWAINWCDLVL 146  
HsMED12 AGTKPLTQLAKKVPFIKKEEVFGYLAKYTPVPMRAAWLIKMTCAYYAAISETKVKKRHV 180  
\* \* .\*\*::\* : : \* \* \* : .\*\*::\*\*:\*:\*\* \* . : . :

CCT LLFLQEHLTRHKLLGVSNGQKMLLNICNTSWMNFCHGIAHFLLSKLEIGHHRCFIQDQCK 206  
HsMED12 DPFMEWTQIITKYLWEQLQMAEYYRPGPAGSGGCGSTIGPLPHDVEVAIRQWDYTEKLA 240  
\*:: \* \* . : : . : . \* . \* .:\*.. : : :

CCT RIVQHQAFTARKHLYILNGGIWCVFYSG-TMLKGGFFLISLLIGFSSSYSFVNFHFALL 265  
HsMED12 MFMFQDGMLEDRHEFLTWVLECFEKIRPGEDELLKLLPLLLRYSGEFVQSAYLSRRLAYF 300  
: : : : : : \* : : : : . : \*\* : : \* : \* . : : : : \* :

CCT QEKEIFEILQLLLPIVYGVLESIVLSQTYVQSLVAIAVRFIQEPAPGGSDLVDNSRRAYT 325  
HsMED12 CTRRLALQLDGVSSSHSHVIS--AQSTSTLPTTPAPQPPTSSTPSTPFSLLMCPQHRPL 358  
: : \* : : . \* : . \* : : : \* . \* : . \* \* : : : :

CCT LSALIEMVRYLVLAAPDTFVASDFFPLPPSVAACGPNDVSYTSKAYENLEKLRNSNAEIS 385  
HsMED12 VFGLSCILQTIILLCCPSALVWHYSLTDSRIKGTGSPDLHLPIAPSNLPMPEGNSAFTQQVR 418  
: .\* : : : : \* . \* : \* : . . : . . : : . . \* : : : :

CCT AQFQGRGVLRSFEFLSFDYTIQTSADDLAKIASAGYPQHNVAKAVQALDKALSDGDI 445  
HsMED12 AKLR-----EIEQIKERGAQAVEVRWSFDKQEQATAGFTIGRVLHTLEVLDHSFE--- 469  
\* : : : . : \* : : . : \* : \* : : \* : \* : : . \* : : : : \* . :

CCT RAAYSYLFEDLCNGAVDEAWITDVSPCLRSSLRWIGAISTSFVCSVFFLIEWATCDFRDF 505  
HsMED12 RSDFSNSLDSLNC-----RIFGLGPKDG-----HEISSDDDAVVSLLCEWAVSCKRSG 518  
\* : \* : : . \* \* \* \* \* : : \* : : . \* : : \* \* \* \* . \* . :

CCT RAGVPKDIKFSGRKDCSQVYLVLIQLLKQKILGGEFTARKGKNCRNFLGVSKPSGSMDF 565  
HsMED12 RHRAMVVAKLLEKR-----QAEIEAERCGESEAADEKGSIASGSLSAPSAPIFQDVLL 571  
\* . \* : : : : : : : \* : : \* . . . . \* \* . :

CCT ESPGPLHDIIVCWIDQHEVHKGGAKRLQLLVFELIRSGIFNPIAYVRQLIVSGMIDVIQP 625  
HsMED12 QFLDTQAPMLTD--PRSESERVEFFNVLVLLFCELIRHDFVSHNMYTCTLISRGDLAFGAP 629  
: .. : : . : \* : : . \* \* . \* \* \* . \* . \* \* \* : . \*

CCT AVDPERRMRHHRIKQLPGCFVHETLEEAQLFGGDKLSEAVRTYSNERRLLLRELLVEKG 685  
HsMED12 GPRPPSPFDDP-----ADDPHEKEAEGSSSSKLEDPLGSESMIDPSS-SVLFEDM 679  
. \* : . . : : \* : : \* \* : : \* : : \* \* : : \* \* . :

CCT KYWNNLVLSLQKSKKISTSLSSVIFPRACNAKSNKGRKHTKSSVDIRELKERISALLQ 745  
HsMED12 EKPDFSLSFPTMPCGKGSPEKPKDVEKEVKPPPKEKIEGTLGVLYDQPRHVQYATHFP 739  
: : : \* . : . \* \* . : . \* . \* : \* : : : : : : :

CCT FPG-MSCGVEPVRDEFQNSVKRS-SGSVYSKMDQPEATPGCEDCRRAKRPMNDEKSSC 803  
HsMED12 IPQEECSHECNQRLVVLVFGVGKQRDDARHAIKKITKDILKVLNRKGTAEITDQLAPIVPL 799  
: \* \* \* . \* . \* : . . : : : : : : : : : : . :

CCT YQGNSPIASDEEDNWWIKKGSKTVESSLKVDPOIEITKQVPRGRQMARKTQSLAQQA 863  
HsMED12 NPGDLTFLGGEDGQKRRNRPEAFPTAEDIFAKFQHLSHYDQHQVTAQVSRNVLEQITSF 859  
\* : . . \* : : : : : : : : : : : : : : : : \* \* : :

CCT RIEGSQASTSHVCDNKVSCPHHGGVEGENQKVVDFRSTPVDMSVGNLSKQLQFVD 923  
HsMED12 ALGMSYHLPVQHVQFIFDLMEYSLSIGLIDFAIQLLNELSVVEAELLKSSDLVGSYT 919  
: \* . : : . . : . . \* : : : : : : \* : : \* . :

CCT KRSIAVWLTAVRQLVEEPQKSSVRVQGFNRGAPVEEKNTIRWKLGADELYSILFLLDIS 983  
HsMED12 T-SLCLCIVAVLRHYHACLILNQDMAQVFEGLCGVVKHGMNRS DGSSAER---CILAYL 975  
. \*: : : : : \*: . . : : \* . \* \* : : . \* : . \*

CCT LDLVSAGGRNLVTVPRNVENNMCEIGEAILVSSLRRYENILLSADLVPEAMTALMNRAS 1043  
HsMED12 YDLYTSCSHLKNKFGELFSDFC SKVKNTIYCNVEPSESNMRWAPEFM---IDTLENPAAH 1032  
\*\* : : . : . : : : : \* . . \* : : : : : : \* \* \*\*

CCT LMSSNGKISGSAAALVYTRYILKRYGSLPSVVEWHNNFKATSEKKLLSELD-HTRSGNGEY 1102  
HsMED12 TTTYTGLGKSLSEN PANRYSFVCNALMHVVCVGHHPDRVNDIAILCAELTG YCKSLSAEW 1092  
: : \* . . : . \*\* : . : \* \* : : . . \* \*\* : : \* . \* :

CCT GNPLGVPAGVDNP-----DYL RKKISIGGARPSRVGLSMRDVLRHVEEATHYLKKLIG 1157  
HsMED12 LGVLKALCCSSNNGTCGFNDLLCNVDVSDLSFHDSLATFVAILIARQCLLEDLIRCAA 1152  
. \* . . . \* : \* \* : . : . : : : \* : . : :

CCT TGTMKASLAEKNDD-GYQVAQQIVVGLMDCIRQTGGAAQEGDPSLVSSAVSAIINSVGLS 1216  
HsMED12 PSLLNAAACEQDSEPGARLTCRILLHLFKTPQLN-PCQSDGNKPTVGIRSSCDRHLLAAS 1211  
. . : : \* : \* : : \* : : : \* : \* . . . : \* : . \* . \* . : : \*

CCT VARITDFSLGNIYQNHPSGV DSSNIARYILRIHITCLCLLKEALGERQSRVFEIALATES 1276  
HsMED12 QNRIVDGAVFVAVLKAVFVLGDAELKSGSFTVTGGTEELPEEEGGGGSGRRQGGRNISVE 1271  
\*\* . \* : : : : \* : . . : \* : \* : \* . \* : . : .

CCT STALTGVFAPVKSGRQHQQLSPESYDSNANNSTIDMSNGTKMALSRA TKITA AVSALVI 1336  
HsMED12 TASLDVYAKYVLR SICQEQEWVGERCLKSLCEDSNLDQ PVLSSAQQRMLQLICYPHRL 1331  
: : \* \* \* \* \* : : \* . . : : \* : : . . \* : : . . : :

CCT GSITHGVITLERIVG LLRLKDYLD FVQFVRRTKSSSNGSARS MGASKVESPIEVYVHWF 1396  
HsMED12 DNEDGENPQRRIKRILQNL DQWTRQSSLELQLMIKQTPNNEMNSLLENIAKATIEVFQ 1391  
. . : : \*\* \* : \* : \* . : : : . . . \* : \* . . . \* :

CCT LLVGNC KTVSEGLVLELVGESSVAISR MQR-----MLPLKLVFP PAYSIIAFVLRP PFV 1451  
HsMED12 QSAETGSSSGSTASNMPSSSKTKPVLSSLERSGVWLVA PLIAKLPTSVQGHV LKAAGEEL 1451  
. . : : . . . . : : \* : \* : \* : \* : \* : . : : :

CCT SNSNSNSSVHEDTHRLYQSLTMAFH DVIKHL PFRDVCFRDTQGLYELIVADSTDAEFASV 1511  
HsMED12 EKGQHLGSSSRKERDRQKQKSM SLLSQPFLSLVLTCLKGQDEQREGLLTSLYSQVHQIV 1511  
. : : . \* . . : . : \* : : . . \* : : \* : : : \* : : . . \*

CCT FESHGLDMHLKSVAFAPLRARLFLNSLIDCKVPSSGYSHEGVSEAKNRHQNGTKLV DKL 1571  
HsMED12 NNWR-----DDQYLD DCKPKQLMHEALKRLRLNLVGGMFDTVQRSTQQTTEWAM LLEII 1565  
: : . . : : : : : : \* : \* : \* : : . \* : : :

CCT VS-VLDCLQPAKFHWQWVLRLL LNEQALAEKLENHDMPLTDAIRSSCPTSEKPDASENE 1630  
HsMED12 ISGTVDMQSNNELFTTVLDMLSVLINGTLAADMSSISQGSMEENKRAYMN---LAKKLQ 1621  
\* : \* \* . : : : : \* : \* : \* . . . : : : . \* : : :

CCT KNFIQILLTRLLV RPD AVPLFSEVVHLFGRSVEDSMLKQAEWFLAGQDVLFGRKKTIRQKL 1690  
HsMED12 KELGERQSDSLEKVRQLLPLPKQTRD VITCEPQGS LIDTKGNKIAGFDSIFKKEGLQVST 1681  
\* : : : \* : \* : \* . . . : . : \* : : . \* \* \* : \* : : :

CCT IIVGESKGLPT--KPQFWKPGWGNSSSDHITANKAGKRRKFEITSIEEG-----EV 1741  
HsMED12 KQKISPWDLFEGLKPSAPLSWGWFGTVRVD RRVARGEEQRLLLYH THLRPRRAYYLEP 1741  
. . \* \*\* . \*\*\* . : \* : \* . : \* : : . \*

CCT IEEGSGSRKVLPRVLDENSP SVGYGITTE RAFVQLVLP CIDQSSDES RSTFVNELVRQF 1801  
HsMED12 LPLPPEDEEPPAP T LLEPEKKAPEPPKTDKPGAAPPSTEERKKKSTK GKRSQPATKTED 1801  
: . . : \* \* : : : \* : . . . \* : : :

CCT SNIEQQLSSVTN STTSNKQMG TASSGSEISSNKGSTRKGLRGGSPSLARRSS-----A 1855  
HsMED12 YGMGPRSGPYG-VTVPPDLLHHPNPGSITHLNYRQSG IGLYTONQPLPAGGPRVDPYRP 1860  
. : \* . \* . . : . . \*\* \* . \*\* . \* . . .

```

CCT          NTTDTSPPPSPAALRASMSLRQLQFLLRLLPVICGEPSEFKNTRHALAS-----TIVR 1906
HsMED12     VRLPMQKLPTRPTYPGVLP TMTGVMGLEPSSYKTSVYRQQQPAVPQGOQLRQOQLOOSQG 1920
           . *: .: . . : : * * . : : * : .

CCT          LLGSRVVYEDYAVCSPRSELSKAETESTIDPSSMADLSSEVLFDRLLFVLHGLLSNHQPK 1966
HsMED12     MLGQSSVHQMTPTSSSYGLQTSQGYTPYVSHVGLQQHTGPAGTMVPPSYSSQPYQSTHPST 1980
           :**. *: . . * : : * . . . . . : : : * . * .

CCT          WLKPRPSSNESKDFTLFDRDAAESLQNELSRMQLPDTIRWRIQAAMPILLPSLRCSLSC 2026
HsMED12     NPTLVDPTRHLQQRPSTGYVHQQAPTYGHGLTSTQRFHQTLQQTTPMISTMTPMSAQQVQA 2040
           . . . . . : : : : * : : * : * . : . . : * . . .

CCT          QPHSVPPTALTLVQPSGSTAAAGTNQRNSPAISKSGTAAAQGGKPKPTMLAPHQQQEQADNT 2086
HsMED12     GVRSTAILPEQQQQQQQQQQQQQQQQQQQQQQQQQQQQQQYHIRQQQQQQILRQQQQQQQQQQQQ 2100
           :*.. . * . . :*:. . . * : : : :***: :

CCT          DVVDPWTLLEDGTSSGLSSSNASNSSDMANLRATCWLKG-----AVRVRRTDL 2134
HsMED12     QQQQQQQQQQQQQQQHQQQQQQQAAPPQPQPQSQPQFQROGLQQTQQQQQTAAALVRQLQQ 2160
           : : : : . . . . . : : : : : : : : * . ** :

CCT          TYVGSVDDDS----- 2144
HsMED12     QLSNTQPQPSTNIFGRY 2177
           . : : *

```

identical residues (\*) 265/2144 = 12%

highly conserved residues (same color) (:) 452/2144 = 21%

semi-conserved residues (.) 357/2144 = 17%

Alignment made with Clustal W <http://www.ebi.ac.uk/clustalw/>

Colors:

Red = Small and hydrophobic residues (AVFPMILW)

Blue = Acidic residues (DE)

Magenta = Basic residues (RK)

Green = Hydroxyl + Amine (STYHCNGQ)
