# Supplementary material
Source: PubMed Central journal article supplement (PMC2796935)

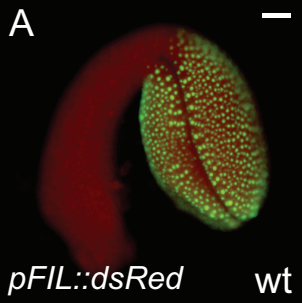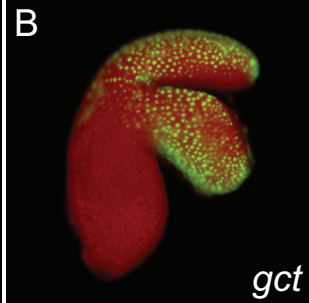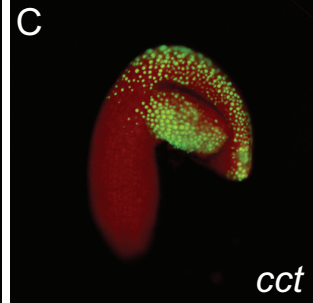

Supplement: supp_137.1.113_043174-FigS1.pdf [file supp_137.1.113_043174-FigS1.pdf]

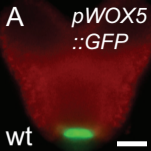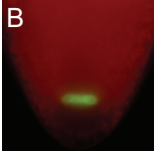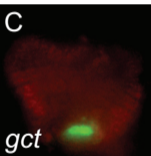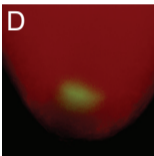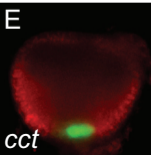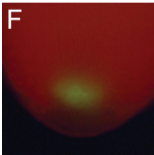

Supplement: supp_137.1.113_043174-FigS4.pdf [file supp_137.1.113_043174-FigS4.pdf]
